1 **Determinants of normal haemoglobin concentration among children in Ghana: a**  
2 **positive deviance analysis of nationally representative cross-sectional survey**  
3 **data**

4

5

6 Dickson A. Amugsi<sup>1\*</sup>

7 damugsi2002@yahoo.com; [damugsi@aphrc.org](mailto:damugsi@aphrc.org)

8

9 1. African Population and Health Research Center (APHRC)

10

11 \* Corresponding author: Dr. Dickson A. Amugsi, APHRC Campus, P.O Box 10787-  
12 00100, Nairobi, Kenya, Tel: +254204001125, Fax: +254204001101

13

14

15

16

17

18

19

20

21

22

23

24

25

26

27

28

29  
30  
31  
32  
33  
34  
35  
36  
37  
38  
39  
40  
41  
42  
43  
44  
45  
46  
47  
48  
49  
50  
51  
52  
53  
54  
55

**Abstract**

Anaemia among children under 5, is a public health problem of serious concern. In Ghana, 8 out of every 10 children are anaemic. This study employed a novel approach to investigate the determinants of normal haemoglobin (Hb) concentration among children aged 6 to 59 months, using data from the Ghana Demographic and Health Surveys. The results showed that a year change in maternal education was positively associated with normal Hb concentration. Children of non-anaemic mothers were 1.67 (CI=1.32, 2.10; P<.001) times more likely to have normal Hb concentration relative to children of anaemic mothers. Compared to mothers who had less than 4 antenatal care (ANC) visits, mothers who had at least 4 ANC visits increased the odds of their children having a normal Hb concentration by 1.62 (CI=1.09, 2.40; P<.018). Children living in middle and rich households had respectively 1.48 (CI=1.06, 2.07; p<.021) and 1.59 (CI=1.08, 2.33; p<.018) increased odds of having a normal Hb concentration relative to those living in poor households. Maternal education, anaemia, ANC attendance, and household wealth index are strong determinants of normal Hb concentration among children in Ghana. Strategies aimed at addressing childhood anaemia should take into account maternal anaemia, education, poverty and ANC attendance.

**Keywords:** Hb concentration, Anaemia, positive deviance, children, Ghana

## 56 Introduction

57  
58 Anaemia, defined as blood haemoglobin concentration lower than normal (1, 2) is  
59 a pervasive problem among children under five years of age. It reflects a state in which  
60 the number of red blood cells is low, or their ability to carry oxygen is poor (3). If  
61 anaemia is left untreated, it can have significant negative consequences on child health,  
62 some of which can be long lasting (4) and potentially derail the life-course wellbeing into  
63 adulthood. These adverse health consequences include but are not limited to poor  
64 cognitive development, difficulty with concentration, lethargy, increased mortality,  
65 susceptibility to infection and loss of economic productivity in adulthood (5, 6). Given the  
66 consequences, there is an urgent need for effective and efficient public health  
67 interventions to address anaemia in children. To be able to design effective  
68 interventions, it is significant to have clear understanding of the factors that have the  
69 potential to prevent children from developing anaemia. The present study is set out to  
70 illuminate these factors by focusing on children who have normal Hb concentration (i.e.  
71 children who do not have any form of anaemia). The study will provide a robust  
72 understanding of what promote normal Hb concentration, rather than the risk factors of  
73 low Hb concentration (anaemia). Indeed, knowledge about the determining factors of  
74 normal Hb concentration in children, which is currently lacking in sub-Saharan Africa  
75 (SSA), is essential for developing effective anaemia prevention programmes.

76 Data from the World Health Organisation (WHO) show that anaemia is one of the  
77 ten most serious health problems in the world (1). Globally, it is estimated that about  
78 273.2 million children aged from 6 to 59 months suffer from anaemia, with an overall  
79 prevalence of 43% (3). The problem is particularly serious in Africa, where  
80 approximately 60% of preschool children are anaemic (7). The prevalence in the SSA  
81 region ranges from 42% in Swaziland to 91% in Burkina Faso (8). In Ghana, the focus  
82 of the present study, the overall prevalence of anaemia in children aged 6 to 59 months  
83 stands at 78.4% (9, 10), indicating that less than a third (21.6%) of children in Ghana  
84 have normal Hb concentration or are non-anaemic. The question is, what makes the  
85 21.6% (defined in this study as *positive deviants*) to have normal Hb concentration,  
86 although they live in the same country as the rest of the children who are anaemic?  
87 What are the possible factors at the individual, household and community levels that

88 influence normal Hb concentration for these children? Understanding this will help  
89 design effective programmes to help prevent pre-school children in Ghana from  
90 developing anaemia.

91         However, to be able to address the questions outlined above, we needed an  
92 approach that will focus on the positive aspects of health and the associated  
93 determinants rather than negative health outcomes. Therefore, this study utilised  
94 *positive deviance* (PD), a resource oriented approach as the analytical strategy. The  
95 concept of PD is premised on the notion that in “*every community there are certain*  
96 *individuals or groups whose uncommon behaviours and strategies enable them to find*  
97 *better solutions to problems than their peers, while having access to the same*  
98 *resources and facing similar or worse challenges*”(11, 12). The PD concept aims to  
99 study the behaviours and characteristics of those who achieve better results on a given  
100 health outcome than their peers who reside in the same community (13). It is a well-  
101 established concept and can be explored using a statistical approach, and often  
102 quantified as those who do not experience a negative outcome of interest compared to  
103 those around them in the same settings (13). The PD approach has previously been  
104 used to investigate new born care, child nutrition, safe sexual practices, malaria control,  
105 health service delivery and educational outcomes in many settings (14-22). Indeed,  
106 almost all of these PD studies were conducted outside SSA. In Ghana for example, the  
107 application of PD in investigating child health outcomes is relatively rare. This suggests  
108 the need for more research using the PD approach in Ghana.

109         The novelty of the PD approach is its focus on ‘positive’ aspects of an outcome  
110 instead of the ‘negative’, and can identify potential points of intervention. In the present  
111 study, *positive deviants* were children who lived in anaemia endemic Ghana and yet  
112 have normal Hb concentration (not anaemic) relative to their counterparts who live in  
113 the same country but are anaemic. The main objective of this study is to examine the  
114 determinants of normal Hb concentration among children living in Ghana. Identifying  
115 these determinants would provide the basis for designing programmes, targeting  
116 children at risk of low Hb concentration in Ghana. This resource focused approach  
117 moves away from the dominant risk model approach, where the focus is usually on  
118 children with poor health and the associated risk factors.

119

## 120 **Methodology**

### 121 *Design and data sources*

122 Data on haemoglobin (Hb) concentration (anaemia) among children aged 6–59  
123 months from the 2014 Ghana Demographic and Health Surveys (GDHS) (23) were  
124 used in the analysis. The DHS surveys are designed to be representative at the  
125 national, regional and rural-urban levels. The Ghana DHS employed a two-stage  
126 sampling design. The first stage involved selection of clusters from a master sampling  
127 frame constructed from the 2010 national population and housing census. The clusters  
128 are selected using systematic sampling with probability proportional to size. The second  
129 stage selection involves the systematic sampling of the households listed in each  
130 cluster, and households to be included in the survey are randomly selected from the list.  
131 All women aged 15-49 years and their children aged 0-59 months were eligible to  
132 participate in the surveys. The data on children were obtained through face-to-face  
133 interviews with their mothers. The detailed description of the GDHS sampling strategy  
134 can be found elsewhere (10, 24). Our study sample comprised children aged 6–59  
135 months ( $n=2451$ ), born to mothers aged 15–49 years.

136

### 137 **Ethical considerations**

138 The GDHS protocol, including biomarker collection, was reviewed and approved  
139 by the Ghana Health Service Ethical Review Committee and the Institutional Review  
140 Board of ICF International, USA. Written informed consent was obtained from  
141 participants before the survey. For children aged 6-59 months, consent was obtained  
142 from their parents or the adult responsible for the children. The GDHS team made sure  
143 that the biomarker results were made available to study participants. For example, the  
144 Hb test results for all children tested in the household were entered into a malaria and  
145 anaemia brochure and given to the parent or responsible adult. Finally, an anaemia  
146 referral form was given to facilitate immediate treatment at a nearby health facility of  
147 children with an Hb level less than 7.0 g/dl (10). The DHS Program, USA, granted the  
148 author permission to use the data. The data are completely anonymous; therefore the  
149 author did not seek further ethical clearance.

150

## 151 **Outcome and explanatory measures**

### 152 *Outcome measure*

153 The main outcome measure for this analysis was Hb concentration (anaemia).  
154 The GDHS collected blood specimens for anaemia testing from all children aged 6-59  
155 months. Blood samples were drawn from a drop of blood taken from a finger prick (or a  
156 heel prick in the case of children age 6-11 months) and collected in a microcuvette. The  
157 Hb analysis was carried out on-site using a battery-operated portable HemoCue  
158 analyser. The Hb data were categorised into; mild anaemia (Hb concentration of 10.0-  
159 10.9 g/dL), moderate anaemia (Hb concentration of 7.0-9.9 g/dL) and severe anaemia  
160 (Hb concentration of less than 7.0 g/dL) (10). In this analysis, mild, moderate and  
161 severe anaemia were recoded into “anaemic or low Hb concentration” and given a value  
162 of “0” (referenced category), and children who did not suffer from any form of anaemia  
163 were classified as “non-anaemic or normal Hb concentration” and given a value of “1”  
164 (outcome of interest). To make the interpretation of the results easier, considering the  
165 approach used, Hb concentration was used in place of anaemia in the interpretation of  
166 the results. Since *positive deviance* (25) is the analytic lens, children with normal Hb  
167 concentration were classified as *positive deviants*.

168

### 169 *Explanatory measure*

170 The explanatory measures were categorized into four levels of determinants:  
171 *child* (sex, age, birth order, diarrhoea, taking iron pills, drugs for intestinal parasites),  
172 *maternal* (age, education, anaemia status, antenatal care), *households* (household size,  
173 number of children under 5, wealth index) and *community* (place of residence). Some of  
174 these variables were recoded: antenatal care (ANC) was recoded into 0-3 visits  
175 (reference category) and 4 or more visits, while household wealth index was recoded  
176 into poor (reference category), and middle and richer as categories of interest. The  
177 selection of the explanatory variables was guided by the UNICEF conceptual framework  
178 of child care (26). The selected variables were further subjected to bivariate analysis to  
179 establish their relationship with the outcome variable (*results not shown*). All statistically  
180 significant variables were included in the multivariable logistic regression analysis.

181

## 182 *Analytical framework and methods*

183 The analysis in this paper was framed using the extended UNICEF conceptual  
184 framework for childcare (26, 27). The framework posits that child survival, growth and  
185 development are influenced by a web of factors, with three underlying determinants  
186 being food security, healthcare and a healthy environment, and care for children and  
187 women (26). These underlying determinants are in turn influenced by basic  
188 determinants. These basic determinants may be described as “exogenous”  
189 determinants, which influence child health through their effect on the intervening  
190 proximate underlying determinants. Thus, the underlying determinants are  
191 endogenously determined by the exogenous determinants (28). In this analysis, we  
192 built two empirical regression models of the determinants of normal Hb concentration. In  
193 the first model (Model 1), we included maternal, household and community level  
194 determinants. In the second and final model (Model 2), we adjusted for child level  
195 factors. The statistical significant level was set at  $p < .05$ . Results were presented as odd  
196 ratios (ORs) with 95% confidence intervals (CI).

197

## 198 **Results**

### 199 *Descriptive analysis of the characteristics of the sample*

200 The results in Table 1 show that 32% of children in Ghana have normal Hb  
201 concentration, while 56% of their mothers were non-anaemic or had normal Hb  
202 concentration. Twenty three percent (23%) of the children were reportedly taking iron  
203 pills/sprinkles/syrup at the time of the survey. A little over a third (38%) of the children  
204 received drugs for intestinal parasites. The results also showed that 13% of the children  
205 had diarrhoea during the last 2 weeks preceding the survey. An ANC attendance of at  
206 least 4 visits was high among mothers in the sample (89%). A little over half (54%) of  
207 the study participants were living in rural areas. The mean maternal number of years of  
208 education was  $5.2 \pm 4.9$ , while the average age was  $31.0 \pm 6.8$  years. The mean child age  
209 was  $31.3 \pm 15.4$  months. Household size and child birth order were  $5.8 \pm 2.7$  and  $3.4 \pm 2.1$   
210 respectively (Table 2).

211

212

213

**Table 1: Characteristics of socio-demographic factors (n=2451), categorical variables**

| Variables                               | %    |
|-----------------------------------------|------|
| <i>Child anaemia</i>                    |      |
| No anaemia                              | 32.2 |
| Mild to severe anemia                   | 66.8 |
| <i>Child sex</i>                        |      |
| Male                                    | 53.1 |
| Female                                  | 46.9 |
| <i>Maternal anaemia</i>                 |      |
| Not anaemic                             | 56   |
| Anaemic                                 | 44   |
| Taking iron pills/sprinkles/syrup (yes) | 23.4 |
| Drugs for intestinal parasites (yes)    | 37.6 |
| Had diarrhoea recently (yes)            | 12.5 |
| <i>Place of residence</i>               |      |
| Urban                                   | 46.4 |
| Rural                                   | 53.6 |
| <i>Number of antenatal attendance</i>   |      |
| 0-3 visits                              | 11.2 |
| 4+ visits                               | 88.8 |
| <i>Household wealth index</i>           |      |
| Poor                                    | 42.9 |
| Middle                                  | 19.9 |
| Rich                                    | 37.2 |

**Table 2: Characteristics of socio-demographic factors (n=2451), continuous variables**

| Variables                        | Mean  | SD    |
|----------------------------------|-------|-------|
| Maternal education in years      | 5.24  | 4.91  |
| Maternal age in years            | 30.98 | 6.84  |
| Age of child in Months           | 31.26 | 15.44 |
| Number of household members      | 5.81  | 2.722 |
| Number of children under 5 years | 1.77  | .874  |
| Birth order of child             | 3.37  | 2.09  |

214 SD=Standard deviation



215  
216  
217  
218  
219  
220  
221  
222  
223  
224  
225  
226  
227  
228  
229  
230  
231  
232  
233  
234  
235  
236  
237  
238  
239  
240  
241  
242  
243  
244  
245

*Multivariable analysis of the protective factors for childhood anaemia*

The results in Table 3 show that all the maternal and household level factors except household size were significantly associated with normal Hb concentration in the first model (Model 1) but these significant associations disappeared after child level determinants were included the final empirical model (Model 2). Only maternal education, anaemia, ANC attendance, household wealth index and child age maintain their statistically significant association with normal Hb concentration in the final model. A unit change in maternal years of education was associated with 1.05 (CI=1.02, 1.08; P<.001) increased odds of normal Hb concentration. Children of mothers who had normal Hb concentration (non-anaemic) were 1.67 (CI=1.32, 2.10; P<.001 ) times more likely to have normal Hb concentration relative to children of anaemic (low Hb concentration) mothers. Compared to mothers who had less than 4 antenatal care (ANC) visits, mothers who had at least 4 ANC visits increased the odds of their children having a normal Hb concentration by 1.62 (CI=1.09, 2.40; P<.018). Additionally, children living in middle and rich households had 1.48 (CI=1.06, 2.07; p<.021) and 1.59 (CI=1.08, 2.33; p<.018) increased odds of having a normal Hb concentration respectively, relative to those living in poor households. A unit change in child's age was associated with 1.03 (CI=1.02, 1.04; P<.001) increased odds of having a normal Hb concentration or not being anaemic.

246  
247  
248

**Table 3: Multivariable analysis of the determinants of normal Hb concentration among children, 6-59 months (n=2451)**

| Variables                         | Model 1 |               |       |       | Model 2 |               |       |      |
|-----------------------------------|---------|---------------|-------|-------|---------|---------------|-------|------|
|                                   | OR      | 95% CI for OR |       | p     | OR      | 95% CI for OR |       | p    |
|                                   |         | Lower         | Upper |       |         | Lower         | Upper |      |
| <b>Maternal level variables</b>   |         |               |       |       |         |               |       |      |
| Maternal education (in years)     | 1.050   | 1.023         | 1.078 | .001  | 1.051   | 1.022         | 1.080 | .001 |
| Maternal age (in years)           | 1.026   | 1.009         | 1.043 | .002  | 1.021   | .995          | 1.047 | .110 |
| <i>Maternal anaemia</i>           |         |               |       |       |         |               |       |      |
| Anaemic (ref)                     | ref     | ref           | ref   | ref   | ref     | ref           | ref   | ref  |
| Not anaemic                       | 1.581   | 1.263         | 1.980 | .001  | 1.667   | 1.324         | 2.101 | .000 |
| <i>Antenatal attendance</i>       |         |               |       |       |         |               |       |      |
| Number of visits, 0-3 (ref)       | ref     | ref           | ref   | ref   | ref     | ref           | ref   | ref  |
| Number of visits, 4+              | 1.558   | 1.058         | 2.294 | .025  | 1.616   | 1.087         | 2.402 | .018 |
| <b>Household level variables</b>  |         |               |       |       |         |               |       |      |
| Number of household members       | .966    | .912          | 1.022 | .227  | .970    | .915          | 1.028 | .305 |
| Number of children under 5years   | .747    | .622          | .898  | .002  | .908    | .752          | 1.096 | .316 |
| <i>Household wealth index</i>     |         |               |       |       |         |               |       |      |
| Poor                              | ref     | ref           | ref   | ref   | ref     | ref           | ref   | ref  |
| Middle                            | 1.530   | 1.109         | 2.110 | .010  | 1.482   | 1.060         | 2.072 | .021 |
| Rich                              | 1.666   | 1.149         | 2.415 | .007  | 1.591   | 1.084         | 2.334 | .018 |
| <b>Community level variables</b>  |         |               |       |       |         |               |       |      |
| <i>Place of residence</i>         |         |               |       |       |         |               |       |      |
| Rural (ref)                       | ref     | ref           | ref   | ref   | ref     | ref           | ref   | ref  |
| Urban                             | .827    | .616          | 1.110 | .206  | .829    | .611          | 1.124 | .227 |
| <b>Child level variables</b>      |         |               |       |       |         |               |       |      |
| Age of child (in months)          | ....    | ....          | ..... | ..... | 1.031   | 1.022         | 1.040 | .000 |
| <i>Sex of child</i>               |         |               |       |       |         |               |       |      |
| Female (ref)                      | ....    | ....          | ..... | ..... | ref     | ref           | ref   | ref  |
| Male                              | ....    | ....          | ..... | ..... | 1.191   | .953          | 1.489 | .124 |
| <i>Taking iron pills/syrup</i>    |         |               |       |       |         |               |       |      |
| No(ref)                           | ....    | ....          | ..... | ..... | ref     | ref           | ref   | ref  |
| Yes                               | ....    | ....          | ..... | ..... | .929    | .713          | 1.210 | .584 |
| <i>Drugs intestinal parasites</i> |         |               |       |       |         |               |       |      |
| No (ref)                          | ....    | ....          | ..... | ..... | ref     | ref           | ref   | ref  |
| Yes                               | ....    | ....          | ..... | ..... | .995    | .778          | 1.273 | .968 |
| <i>Had diarrhoea recently</i>     |         |               |       |       |         |               |       |      |

|                      |      |      |       |       |       |      |       |      |
|----------------------|------|------|-------|-------|-------|------|-------|------|
| No (ref)             |      |      |       |       | ref   | ref  | ref   | ref  |
| Yes                  | .... | .... | ..... | ..... | 1.222 | .877 | 1.701 | .236 |
| Birth order of child | .... | .... | ..... | ..... | .937  | .853 | 1.030 | .179 |

249 OR= Odds ratio; CI= confidence interval; ref=reference category; Hb=Haemoglobin

## 250 Discussion

251 This study examined the determinants of normal Hb concentration among  
 252 children in Ghana, using nationally representative data. The analysis focused on  
 253 children who are doing well (*positive deviants*) rather than the usual practice of focusing  
 254 on at risk or children with poor health outcomes. The results showed that maternal  
 255 education, anaemia, ANC attendance, household wealth index and child age are strong  
 256 determinants of normal Hb concentration among children. Mothers who have more  
 257 years of education are likely to have children with normal Hb concentration. This  
 258 suggests that the more years of education a mother has the likelihood that their children  
 259 will have normal Hb concentration. This could be attributed to positive influence of  
 260 education on maternal caregiving practices. There is evidence that mothers with more  
 261 years of education are likely to be good caregivers and sensitive and responsive to  
 262 caregiving duties (29, 30). They also tend to have disposal income to be able to provide  
 263 nutritious, including iron rich food for their children. The evidence to this effect can be  
 264 found in a study by Choi and colleagues (31), where children of educated mothers were  
 265 reportedly consuming more iron rich diet such as meat and poultry than did children of  
 266 less educated mothers. Educated mothers are also more likely to utilize child health  
 267 services, which can have a positive effect on their children health outcomes (32, 33).  
 268 The findings from the present study are consistent with the literature. Several studies  
 269 have demonstrated that children with more educated mothers are less likely to develop  
 270 anaemia than those with less educated mothers (31, 34-36).

271 Maternal anaemia status was also illuminated as an important determinant of  
 272 normal Hb concentration among preschool children. There is a strong observed  
 273 relationship between maternal anaemia status and child Hb concentration. Mothers who  
 274 are non-anaemic turn to have children who have normal Hb concentration. Thus,  
 275 whether a child will have normal Hb concentration or not is conditional on the anaemia  
 276 status of the mother. This may be the case because poor maternal health has the  
 277 potential to compromise optimal child caring practices, which will in turn have negative

278 impact on their children health and wellbeing (37, 38). Also, mothers who are non-  
279 anaemic are likely to have access to nutritious food. Since there is a strong correlation  
280 between maternal and child dietary intake (39, 40), the likelihood that the children will  
281 also consume nutritious food is high. The literature on the effects of maternal anaemia  
282 status on childhood anaemia is abound. Studies have shown that mothers Hb level had  
283 significant effect on their children Hb levels (36, 41, 42). Furthermore, in Mozambique,  
284 the odds of having non-anaemic child was higher in communities with low percentage  
285 of anaemic mothers (43). Thus, strategies for minimising childhood anaemia must  
286 address maternal anaemia.

287 This study reveals that mothers who were able to attend at least four ANC visits  
288 are likely to have children with normal Hb concentration. This suggests that higher ANC  
289 visits has the potential to promote normal Hb concentration among children living in  
290 highly endemic anaemia settings. Therefore, promoting ANC attendance among  
291 women of reproductive age will have the potential to protect their children from  
292 developing anaemia in the first 5 years of their life. The positive effect of ANC  
293 attendance on childhood anaemia status could be attributed to the health and nutrition  
294 education mothers received during ANC visits. This could have positive impact on their  
295 feeding and caring practices, and consequently better health outcomes for their  
296 children. Kuhnt and Vollmer (44) found in their study that having at least four ANC visits  
297 is associated with reduced odds of malnutrition among children. ANC attendance has  
298 also been found to associate directly with improved birth outcomes and longer-term  
299 reductions of child mortality and malnourishment (44). There is evidence that women  
300 who have higher ANC visits are also likely to patronise postnatal services (45), with the  
301 consequential positive effect on their children health outcomes. Our findings together  
302 with literature suggest that interventions to address childhood anaemia in Ghana should  
303 promote ANC use among women of reproductive age, so as to protect their children  
304 from developing anaemia.

305 Similarly, the analysis show that the level of household wealth is an important  
306 determinant of normal Hb concentration among children in Ghana. Children who live in  
307 middle and rich household are more likely to have a normal Hb concentration relative to  
308 those who live in poor households. The association is stronger in the rich households

309 than the middle class households. The differential effect can be explained by the fact  
310 that children in rich households are likely have easy access to nutritious food and better  
311 caring practices, prerequisites for optimal child health. The effect of household wealth  
312 on normal Hb concentration could be a confirmation of the widely recognised health  
313 benefits of living in better-off households (42, 46-48). Conversely, Agho and colleagues  
314 (49) observed that children from the richest and middle-class households had a lower  
315 Hb concentration than those from the poorest households (49). This negative  
316 relationship notwithstanding, the evidence as highlighted above is that children in  
317 wealthy household tend to have higher Hb concentration or better health outcomes  
318 compared to those living in poor households.

319 The study is associated with some strengths and limitations. The use of large  
320 nationally representative sample makes the observed associations more robust, and  
321 enhanced the generalisability of the findings to all children 6-59 months in Ghana.  
322 Further, the outcome variable was objectively measured, reducing possible  
323 misclassification. The novelty of this study is its focus on non-anaemic (normal Hb  
324 concentration) children and the associated protective factors rather than risks factors for  
325 childhood anaemia. A limitation worth mentioning is the cross-sectional nature of the  
326 data, which does not lends itself to the establishments of causal relationship between  
327 the predictor and outcome variables. The conclusions in the paper are therefore  
328 interpreted as mere associations between the predictor variables and the outcome  
329 variable. Another limitation is that the use of PD is somewhat limited as we were not  
330 able to explore all the potential PD behaviours that may contribute to normal Hb  
331 concentration in Ghanaian children using quantitative data of this nature.  
332 Notwithstanding, PD is a well-established concept and hence makes it possible to  
333 explore the approach using statistical methods.

334

## 335 **Conclusions**

336 The results of study showed that mothers who have higher years of education  
337 are likely to have children with normal Hb concentration. This suggests that the more  
338 years of education a mother may potentially results in their children having normal Hb  
339 concentration. There is a strong relationship between maternal anaemia status and

340 child Hb concentrations. Mothers who are non-anaemic turn to have children who have  
341 normal Hb concentration. Children who live in middle and rich household are more likely  
342 to have a normal Hb concentration relative to those who live in poor households.  
343 Mothers who are able to attend at least four ANC visits are likely to have children with  
344 normal Hb concentration. Thus, higher ANC visits has the potential to protect children  
345 living in highly endemic anaemia settings from developing anaemia. Interventions  
346 aimed at addressing childhood anaemia in Ghana should take into account maternal  
347 anaemia, education, poverty and ANC attendance.

348

### 349 **Data availability statement**

350

351 This study was a re-analysis of existing data that are publicly available from The  
352 DHS Program at [http://dhsprogram.com/publications/publication-fr221-dhs-final-](http://dhsprogram.com/publications/publication-fr221-dhs-final-reports.cfm)  
353 [reports.cfm](http://dhsprogram.com/publications/publication-fr221-dhs-final-reports.cfm). Data are accessible free of charge upon a registration with the  
354 Demographic and Health Survey program (The DHS Program). The registration is done  
355 on the DHS website indicated above.

356

357

358

359

360

361

362

363

364

365

366

367

368

369

370

371  
372  
373  
374  
375  
376  
377 **References**

- 378 1. World Health Organization. Haemoglobin concentrations for the diagnosis of anaemia  
379 and assessment of severity 2011 [cited 2019 23.10]. Available from:  
380 <http://www.who.int/vmnis/indicators/haemoglobin/en/>.
- 381 2. De Pee S, Bloem MW, Sari M, Kiess L, Yip R, Kosen S. The high prevalence of low  
382 hemoglobin concentration among Indonesian infants aged 3-5 months is related to maternal  
383 anemia. *J Nutr*. 2002;132(8):2215-21.
- 384 3. WHO. Haemoglobin concentrations for the diagnosis of anaemia and assessment of  
385 severity. Vitamin and Mineral Nutrition Information System. Geneva, World Health Organization  
386 2011 [cited 2019 23.10]. Available from: <http://www.who.int/vmnis/indicators/haemoglobin.pdf>.
- 387 4. Semedo RML, Santos MMAS, Baião MR, Luiz RR, da Veiga GV. Prevalence of anaemia  
388 and associated factors among children below five years of age in Cape Verde, West Africa.  
389 *Journal of health, population, and nutrition*. 2014;32(4):646-57.
- 390 5. Balarajan Y, Ramakrishnan U, Ozaltin E, Shankar AH, Subramanian SV. Anaemia in  
391 low-income and middle-income countries. *Lancet*. 2011;378(9809):2123-35.
- 392 6. Osorio MM, Lira PI, Ashworth A. Factors associated with Hb concentration in children  
393 aged 6-59 months in the State of Pernambuco, Brazil. *The British journal of nutrition*.  
394 2004;91(2):307-15.
- 395 7. World Health Organization. Geneva: World Health Organization; 2008. Worldwide  
396 prevalence of anaemia 1993-2005: WHO global database on anaemia; p. 40.
- 397 8. Soares Magalhaes RJ, Clements AC. Spatial heterogeneity of haemoglobin  
398 concentration in preschool-age children in sub-Saharan Africa. *Bull World Health Organ*.  
399 2011;89(6):459-68.
- 400 9. Ewusie JE, Ahiadeke C, Beyene J, Hamid JS. Prevalence of anemia among under-5  
401 children in the Ghanaian population: estimates from the Ghana demographic and health survey.  
402 *BMC Public Health*. 2014;14(1):626.
- 403 10. Ghana Statistical Service (GSS), Ghana Health Service (GHS), ICF International. Ghana  
404 Demographic and Health Survey 2014. Rockville, Maryland, USA: GSS, GHS, and ICF  
405 International.; 2015.
- 406 11. Zeitlin MF, Ghassemi H, Mansour M, Levine RA, Dillanneva M, Carballo M, et al.  
407 Positive deviance in child nutrition: with emphasis on psychosocial and behavioural aspects and  
408 implications for development: United Nations University Tokyo. 1990.
- 409 12. Sternin M, Sternin J, Marsh D. Rapid, sustained childhood malnutrition alleviation  
410 through a “positive deviance” approach in rural Vietnam: preliminary findings. In: Keeley E,  
411 Burkhalter BR, Wollinka O, Bashir N, eds. *The hearth nutrition model: applications in Haiti,*  
412 *Vietnam, and Bangladesh, Report of a Technical Meeting at World Relief Corporation, Wheaton,*  
413 *IL, June 19-21, 1996. Arlington: BASICS, 1997.1997.*
- 414 13. Long KNG, Gren LH, Rees CA, West JH, Hall PC, Gray B, et al. Determinants of better  
415 health: a cross-sectional assessment of positive deviants among women in West Bengal. *BMC*  
416 *Public Health*. 2013;13(1):372.



- 417 14. Bolles K, Speraw C, Berggren G, Lafontant JG. Ti Foyer (hearth) community-based  
418 nutrition activities informed by the positive deviance approach in Leogane, Haiti: A  
419 programmatic description. *Food Nutr Bull.* 2002;23(suppl 4):11-7.
- 420 15. EcoYoff. Positive deviance—take 2. Living and learning newsletter. 2003 [Available  
421 from: <http://ifnc.tufts.edu/pdf/ecoyoff21.pdf>.
- 422 16. Sethi V, Kashyap S, Seth V, Agarwal S. Encouraging appropriate infant feeding  
423 practices in slums: a positive deviance approach. *Pakistan J Nutr* 2003;2:164-6.
- 424 17. Shafique M, Edwards HM, De Beyl CZ, Thavrin BK, Min M, Roca-Feltrer A. Positive  
425 deviance as a novel tool in malaria control and elimination: methodology, qualitative  
426 assessment and future potential. *Malaria journal.* 2016;15:91.
- 427 18. Marsh DR, Schroeder DG, Dearden KA, Sternin J, Sternin M. The power of positive  
428 deviance *BMJ* 2004;329:1177-9.
- 429 19. Marsh DR, Pachón H, Schroeder DG, Ha TT, Dearden K, Lang TT, et al. Design of a  
430 prospective, randomized evaluation of an integrated nutrition program in rural Viet Nam *Food  
431 Nutr Bull* 2002;23(suppl 4):36-47.
- 432 20. Dearden K, Quan N, Do M, Marsh DR, Schroeder G, Pachón H, et al. What influences  
433 health behavior? Learning from caregivers of young children in Vietnam *Food Nutr Bull.*  
434 2002;23(suppl 4):119-29.
- 435 21. Baxter R, Taylor N, Kellar I, Lawton R. What methods are used to apply positive  
436 deviance within healthcare organisations? A systematic review. *BMJ Quality & Safety.*  
437 2016;25(3):190-201.
- 438 22. Ahrari M, Kuttub A, Khamis S, Farahat AA, Darmstadt GL, Marsh DR, et al.  
439 Socioeconomic and behavioral factors associated with successful pregnancy outcomes in upper  
440 Egypt: a positive deviance inquiry *Food Nutr Bull.* 2002;23:83-8.
- 441 23. The DHS Program. Demographic and Health Surveys [Available from:  
442 <http://dhsprogram.com/data/available-datasets.cfm>.
- 443 24. Ghana Statistical Service (GSS), Ghana Health Service (GHS), ICF Macro.  
444 Ghana Demographic and Health Survey 2008 Accra, Ghana: GSS, GHS, and ICF Macro; 2009.
- 445 25. Zeitlin M, Ghassemi H, Mansour M. Positive deviance in child nutrition—with emphasis  
446 on psychosocial and behavioral aspects and implications for development. Tokyo: United  
447 Nations University. 1990.
- 448 26. Engle PL, Menon P, Haddad L. Care and nutrition: concepts and measurements.  
449 Washington, DC: UNICEF/International Food Policy Institute. 1997.
- 450 27. UNICEF. The State of World's Children: Causes of Child Malnutrition 1998 [Available  
451 from: <https://www.unicef.org/sowc98/fig5.htm>.
- 452 28. Zanello G, Srinivasan CS, Shankar B. What Explains Cambodia's Success in Reducing  
453 Child Stunting-2000-2014? *PloS one.* 2016;11(9):e0162668.
- 454 29. Richman AL, Miller PM, LeVine RA. Cultural and educational variations in maternal  
455 responsiveness. *Developmental Psychology.* 1992;28(4):614-21.
- 456 30. NICHD. Early Child Care Research Network. Child care and mother-child interaction in  
457 the first 3 years of life. *NICHD Early Child Care Research Network Dev Psychol*  
458 1999;35(6):1399-413. .
- 459 31. Choi HJ, Lee HJ, Jang HB, Park JY, Kang JH, Park KH, et al. Effects of maternal  
460 education on diet, anemia, and iron deficiency in Korean school-aged children. *BMC Public  
461 Health.* 2011;11:870.
- 462 32. Addai I. Determinants of use of maternal-child health services in rural Ghana. *Journal of  
463 biosocial science.* 2000;32(1):1-15.
- 464 33. Zegeye EA, Mbonigaba J, Dimbuene ZT. Factors associated with the utilization of  
465 antenatal care and prevention of mother-to-child HIV transmission services in Ethiopia: applying  
466 a count regression model. *BMC women's health.* 2018;18(1):187.



- 467 34. Ojoniyi OO, Odimegwu CO, Olamijuwon EO, Akinyemi JO. Does education offset the  
468 effect of maternal disadvantage on childhood anaemia in Tanzania? Evidence from a nationally  
469 representative cross-sectional study. *BMC Pediatr.* 2019;19(1):89.
- 470 35. Gebreweld A, Ali N, Ali R, Fisha T. Prevalence of anemia and its associated factors  
471 among children under five years of age attending at Guguftu health center, South Wollo,  
472 Northeast Ethiopia. *PloS one.* 2019;14(7):e0218961.
- 473 36. Nambiema A, Robert A, Yaya I. Prevalence and risk factors of anemia in children aged  
474 from 6 to 59 months in Togo: analysis from Togo demographic and health survey data, 2013–  
475 2014. *BMC Public Health.* 2019;19(1):215.
- 476 37. Zerihun T, Larson CP, Hanley JA. Anthropometric status of Oromo women of child  
477 bearing age in rural south-western Ethiopia *Ethiopian Journal of Health Development*  
478 1997;11(3):1-7.
- 479 38. Teller H, Yimar G. Levels and determinants of malnutrition in adolescent and adult  
480 women in southern Ethiopia *Ethiopian Journal of Health Development* 2000;14(1):57-66.
- 481 39. Kueppers J, Stein KF, Groth S, Fernandez ID. Maternal and child dietary intake: The role  
482 of maternal healthy-eater self-schema. *Appetite.* 2018;125:527-36.
- 483 40. Amugsi DA, Mittelmark MB, Oduro A. Association between Maternal and Child Dietary  
484 Diversity: An Analysis of the Ghana Demographic and Health Survey. *PloS one.*  
485 2015;10(8):e0136748.
- 486 41. Pasricha SR, Black J, Muthayya S, Shet A, Bhat V, Nagaraj S, et al. Determinants of  
487 anemia among young children in rural India. *Pediatrics.* 2010;126(1):e140-9.
- 488 42. Khan JR, Awan N, Misu F. Determinants of anemia among 6–59 months aged children  
489 in Bangladesh: evidence from nationally representative data. *BMC Pediatrics.* 2016;16(1):3.
- 490 43. Ntenda PAM, Nkoka O, Bass P, Senghore T. Maternal anemia is a potential risk factor  
491 for anemia in children aged 6–59 months in Southern Africa: a multilevel analysis. *BMC Public*  
492 *Health.* 2018;18(1):650.
- 493 44. Kuhnt J, Vollmer S. Antenatal care services and its implications for vital and health  
494 outcomes of children: evidence from 193 surveys in 69 low-income and middle-income  
495 countries. *BMJ open.* 2017;7(11):e017122-e.
- 496 45. Fekadu GA, Ambaw F, Kidanie SA. Facility delivery and postnatal care services use  
497 among mothers who attended four or more antenatal care visits in Ethiopia: further analysis of  
498 the 2016 demographic and health survey. *BMC pregnancy and childbirth.* 2019;19(1):64.
- 499 46. Prieto-Patron A, Van der Horst K, Hutton ZV, Detzel P. Association between Anaemia in  
500 Children 6 to 23 Months Old and Child, Mother, Household and Feeding Indicators. *Nutrients.*  
501 2018;10(9):1269.
- 502 47. Lartey ST, Khanam R, Takahashi S. The impact of household wealth on child survival in  
503 Ghana. *Journal of health, population, and nutrition.* 2016;35(1):38.
- 504 48. Boyle MH, Racine Y, Georgiades K, Snelling D, Hong S, Omariba W, et al. The influence  
505 of economic development level, household wealth and maternal education on child health in the  
506 developing world. *Social science & medicine (1982).* 2006;63(8):2242-54.
- 507 49. Agho KE, Dibley MJ, D'Este C, Gibberd R. Factors associated with haemoglobin  
508 concentration among Timor-Leste children aged 6-59 months. *Journal of health, population, and*  
509 *nutrition.* 2008;26(2):200-9.

510

511

512

513

514

515

516

517

518

519 **Acknowledgements**

520 I wish to express our profound gratitude to The DHS Program, USA for providing us  
521 access to the data. I also wish to acknowledge Ghana Statistics Service and Ghana  
522 Health Service which played critical roles in the data collection process. My gratitude to  
523 Dr. Razak Gyasi for taking the pain to review the final manuscript.

524

525 **Authors' Contribution**

526 D.A.A., conceived and designed the study, performed the data analysis, interpreted the  
527 results and wrote the manuscript. The author takes responsibility of any issues that  
528 might arise from the publication of this manuscript.

529

530 **Competing Interest**

531 The authors have no competing interests to declare.

532 **Funding**

533 This study did not receive funding from any source.

534
